# Supplementary material for: Characterization of Guinea Pig Antibody Responses to Salivary Proteins of Triatoma infestans for the Development of a Triatomine Exposure Marker
Source: PubMed Central journal article supplement (PMC3974673; doi:10.1371/journal.pntd.0002783), 2014-04-03

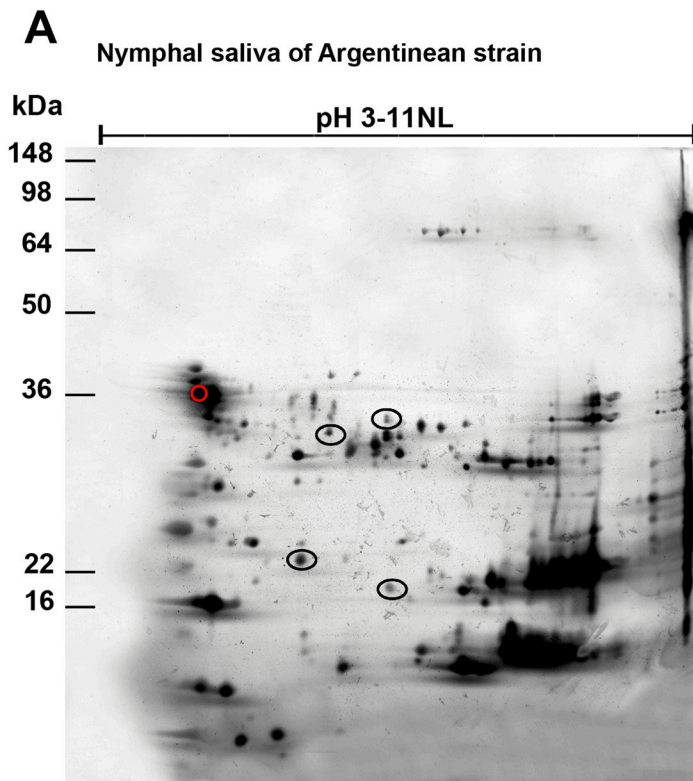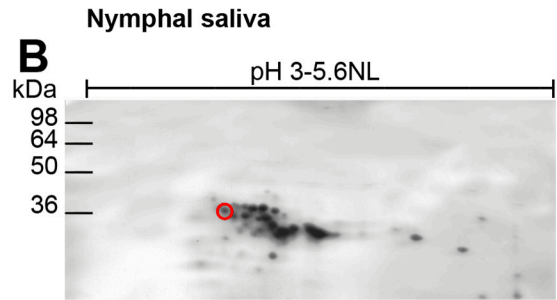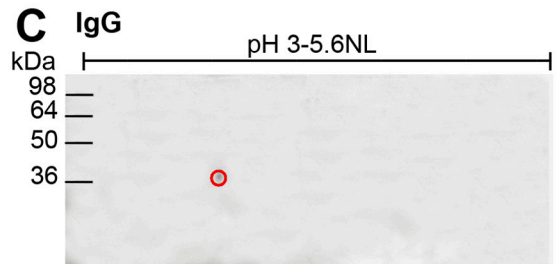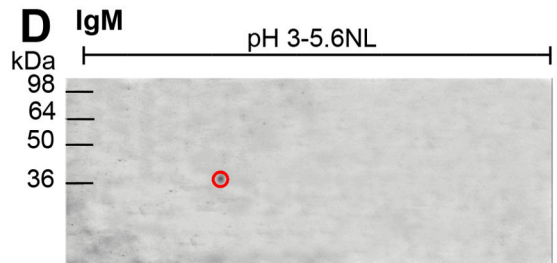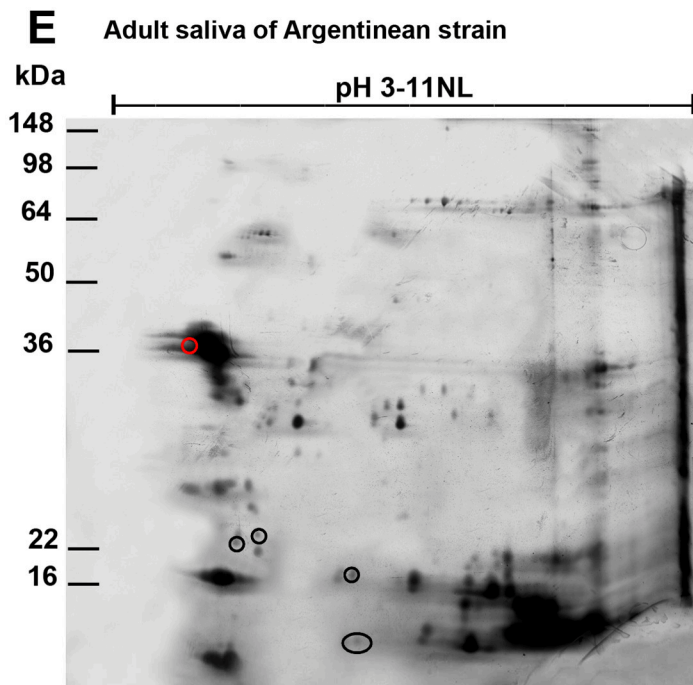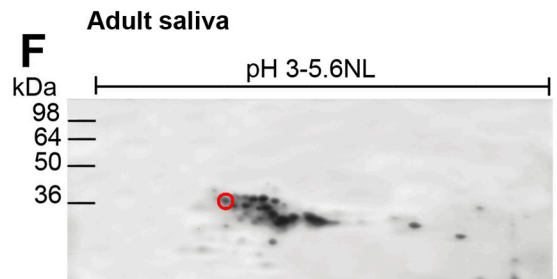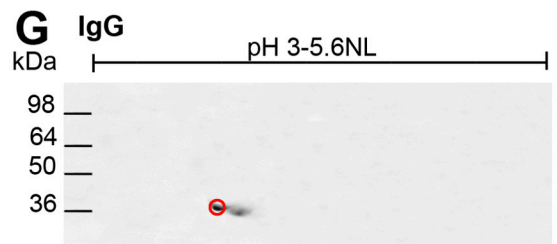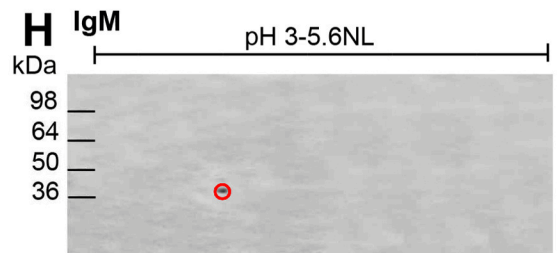

Supplement: pntd.0002783.s001.pdf [file pntd.0002783.s001.pdf]
