# Supplementary material for: Characterization of Guinea Pig Antibody Responses to Salivary Proteins of Triatoma infestans for the Development of a Triatomine Exposure Marker
Source: PubMed Central journal article supplement (PMC3974673; doi:10.1371/journal.pntd.0002783), 2014-04-03

**A** Nymphal saliva of Peruvian strain

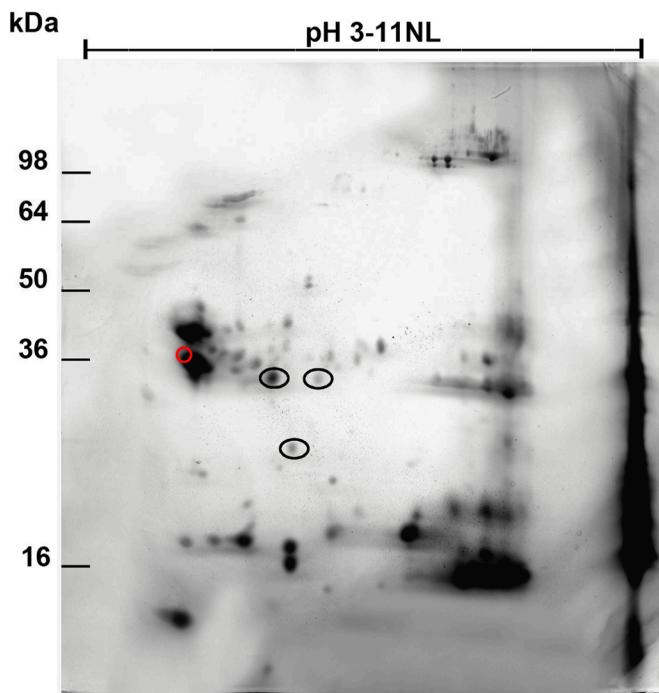

**Nymphal saliva**

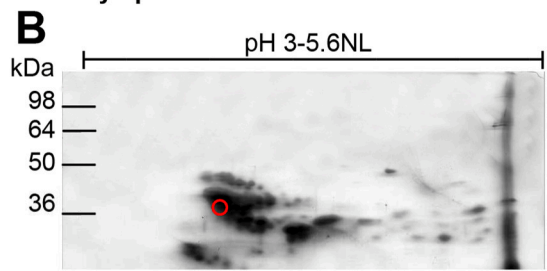

**C IgG**

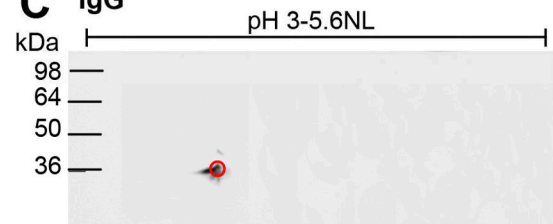

**D IgM**

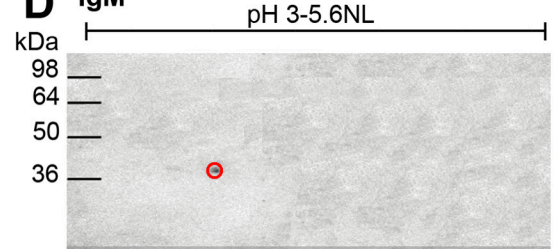

**E** Adult saliva of Peruvian strain

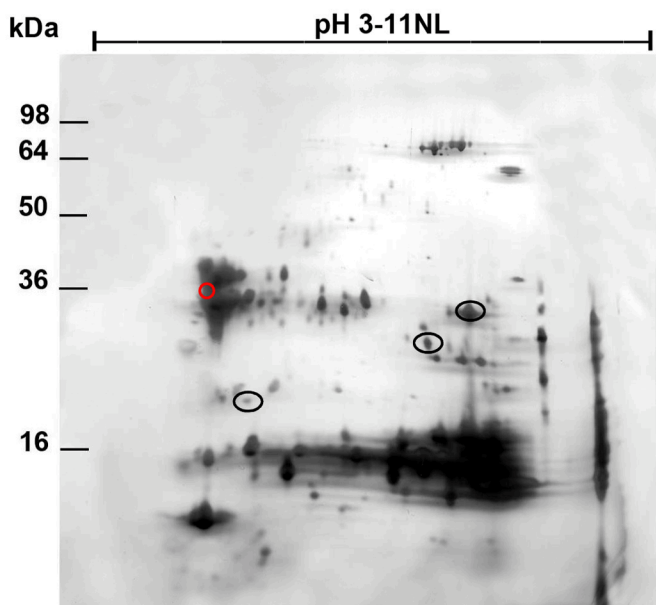

**Adult saliva**

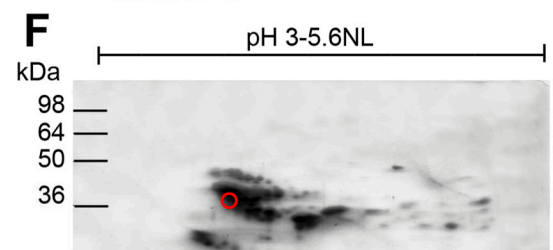

**G IgG**

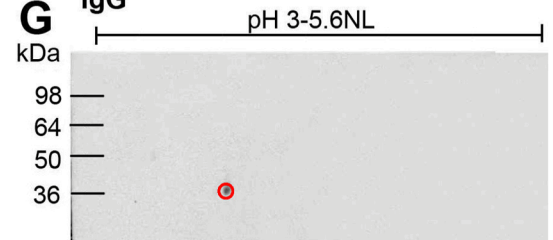

**H IgM**

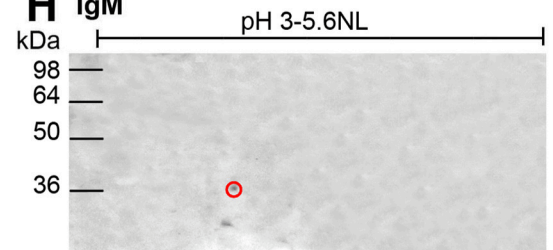

Supplement: pntd.0002783.s003.pdf [file pntd.0002783.s003.pdf]
