# Supplementary material for: Characterization of Guinea Pig Antibody Responses to Salivary Proteins of Triatoma infestans for the Development of a Triatomine Exposure Marker
Source: PubMed Central journal article supplement (PMC3974673; doi:10.1371/journal.pntd.0002783), 2014-04-03
Supplement: pntd.0002783.s004.pdf [file pntd.0002783.s004.pdf]

**Table S1.** Origin of the *Triatoma infestans* strains.

| <b>Origin</b> | <b>Department</b>                | <b>Province</b> | <b>Municipality</b> | <b>Community</b> | <b>Habitat</b>            | <b>GPS data</b>                             |
|---------------|----------------------------------|-----------------|---------------------|------------------|---------------------------|---------------------------------------------|
| Argentina     | Libertador General<br>San Martin | Chaco           | Pampa del Indio     | Pampa del Indio  | Peridomestic              | 26°02'56.47"S,<br>59°56'32.44"W,<br>97m     |
| Bolivia       | Cochabamba                       | Capinota        | Lipez               | Lipez city       | Peridomestic              | 17°34'21.38"S,<br>66°15'52.93"W,<br>2525m   |
| Chile         | Region of Atacama                | Huasco          | Vallenar            | Cachiyuyo        | Domestic                  | 29°02'11.54"S,<br>70°53'55.08"W,<br>829 m   |
| Peru          | Arequipa                         | Arequipa        | Mariano Melgar      | Mariano Melgar   | Domestic and peridomestic | 16°24' 02.18"S,<br>71°29'59.13"W,<br>2464 m |
