# Supplementary material for: Characterization of Guinea Pig Antibody Responses to Salivary Proteins of Triatoma infestans for the Development of a Triatomine Exposure Marker
Source: PubMed Central journal article supplement (PMC3974673; doi:10.1371/journal.pntd.0002783), 2014-04-03
Supplement: pntd.0002783.s005.pdf [file pntd.0002783.s005.pdf]

**Table S2.** Immunogenic salivary antigens of four different *T. infestans* strains.

| kDa* | IgG antigens |   |         |   |       |   |      |   | IgM antigens |   |         |   |       |   |      |   |
|------|--------------|---|---------|---|-------|---|------|---|--------------|---|---------|---|-------|---|------|---|
|      | Argentina    |   | Bolivia |   | Chile |   | Peru |   | Argentina    |   | Bolivia |   | Chile |   | Peru |   |
|      | N            | A | N       | A | N     | A | N    | A | N            | A | N       | A | N     | A | N    | A |
| 91   | x            |   |         |   |       |   |      | x | x            |   |         |   |       |   |      |   |
| 88   |              | x |         |   |       | x |      | x | x            |   | x       |   |       |   |      |   |
| 79   | x            |   | x       | x | x     |   |      | x |              | x | x       |   |       |   |      |   |
| 71   | x            | x |         |   |       |   |      | x |              |   | x       | x |       |   |      |   |
| 64   |              | x |         |   |       | x |      |   |              |   |         |   | x     |   | x    |   |
| 60   |              |   |         |   |       | x |      |   |              |   | x       | x |       | x |      |   |
| 55   |              | x |         |   |       |   |      |   |              |   |         |   |       | x | x    |   |
| 51   |              |   |         |   |       | x |      |   |              |   |         |   |       |   |      |   |
| 48   |              |   |         |   |       |   | x    |   |              |   |         |   |       |   |      |   |
| 43   |              |   | x       | x |       |   |      | x | x            |   | x       |   |       |   |      |   |
| 40   |              | x |         |   |       |   | x    | x | x            |   |         |   |       |   | x    | x |
| 36   |              |   | x       | x |       | x | x    | x |              |   |         | x | x     |   | x    | x |
| 35   | x            | x | x       | x | x     | x | x    | x | x            | x | x       | x | x     | x | x    | x |
| 33   | x            | x | x       | x | x     | x | x    | x |              |   |         |   |       |   | x    | x |
| 32   |              |   |         | x | x     | x | x    | x | x            |   |         |   |       | x | x    | x |
| 30   | x            |   | x       | x |       | x | x    | x |              |   |         |   |       |   |      |   |
| 28   | x            |   |         | x |       | x |      |   |              |   |         |   |       |   |      | x |
| 27   |              |   |         | x |       |   |      |   |              |   |         |   |       |   |      |   |
| 25   | x            | x | x       | x | x     | x |      |   |              | x |         |   |       | x | x    |   |
| 24   |              |   | x       | x |       |   |      |   |              |   |         |   |       |   |      |   |
| 21   | x            |   |         | x | x     | x |      | x |              |   |         |   |       | x |      |   |
| 18   |              |   |         |   |       | x |      |   |              | x |         |   |       |   |      |   |
| 15   |              |   | x       | x | x     | x |      |   |              | x | x       |   |       | x |      |   |
| 14   | x            |   | x       | x | x     |   |      |   |              |   |         |   |       |   |      |   |
| 13   |              |   |         |   |       | x | x    |   |              |   |         |   |       |   |      |   |
| 12   |              |   |         |   |       |   |      |   | x            |   |         |   |       |   |      |   |
| 8    |              |   |         |   |       |   | x    |   |              |   |         |   |       |   |      |   |

\* The presented proteins reacted with IgG or IgM antibodies of at least one guinea pig serum, respectively.
