# Supplementary material for: Characterization of Guinea Pig Antibody Responses to Salivary Proteins of Triatoma infestans for the Development of a Triatomine Exposure Marker
Source: PubMed Central journal article supplement (PMC3974673; doi:10.1371/journal.pntd.0002783), 2014-04-03
Supplement: pntd.0002783.s006.pdf [file pntd.0002783.s006.pdf]

**Table S3.** Correlation between sum of feeding *T. infestans* and IgG antibody response of guinea pigs

| <b>IgG antibody response to saliva of certain developmental stage/strain of <i>T. infestans</i></b> | <b>Spearman rank correlation test</b> |
|-----------------------------------------------------------------------------------------------------|---------------------------------------|
| Bolivian nymphs                                                                                     | r= 0.988; p<0.0001                    |
| Bolivian adults                                                                                     | r= 0.952; p<0.001                     |
| Chilean nymphs                                                                                      | r= 0.988; p<0.0001                    |
| Chilean adults                                                                                      | r= 0.952; p<0.001                     |
| Argentinean nymphs                                                                                  | r= 1.0; p<0.0001                      |
| Argentinean adults                                                                                  | r= 0.976; p<0.0001                    |
| Peruvian nymphs                                                                                     | r= 0.945; p<0.0001                    |
| Peruvian adults                                                                                     | r= 0.951; p< 0.0001                   |
